# Supplementary material for: Automatic landmark annotation and dense correspondence registration for 3D human facial images
Source: PubMed Central journal article supplement (PMC3724574; doi:10.1186/1471-2105-14-232), 2013-07-22

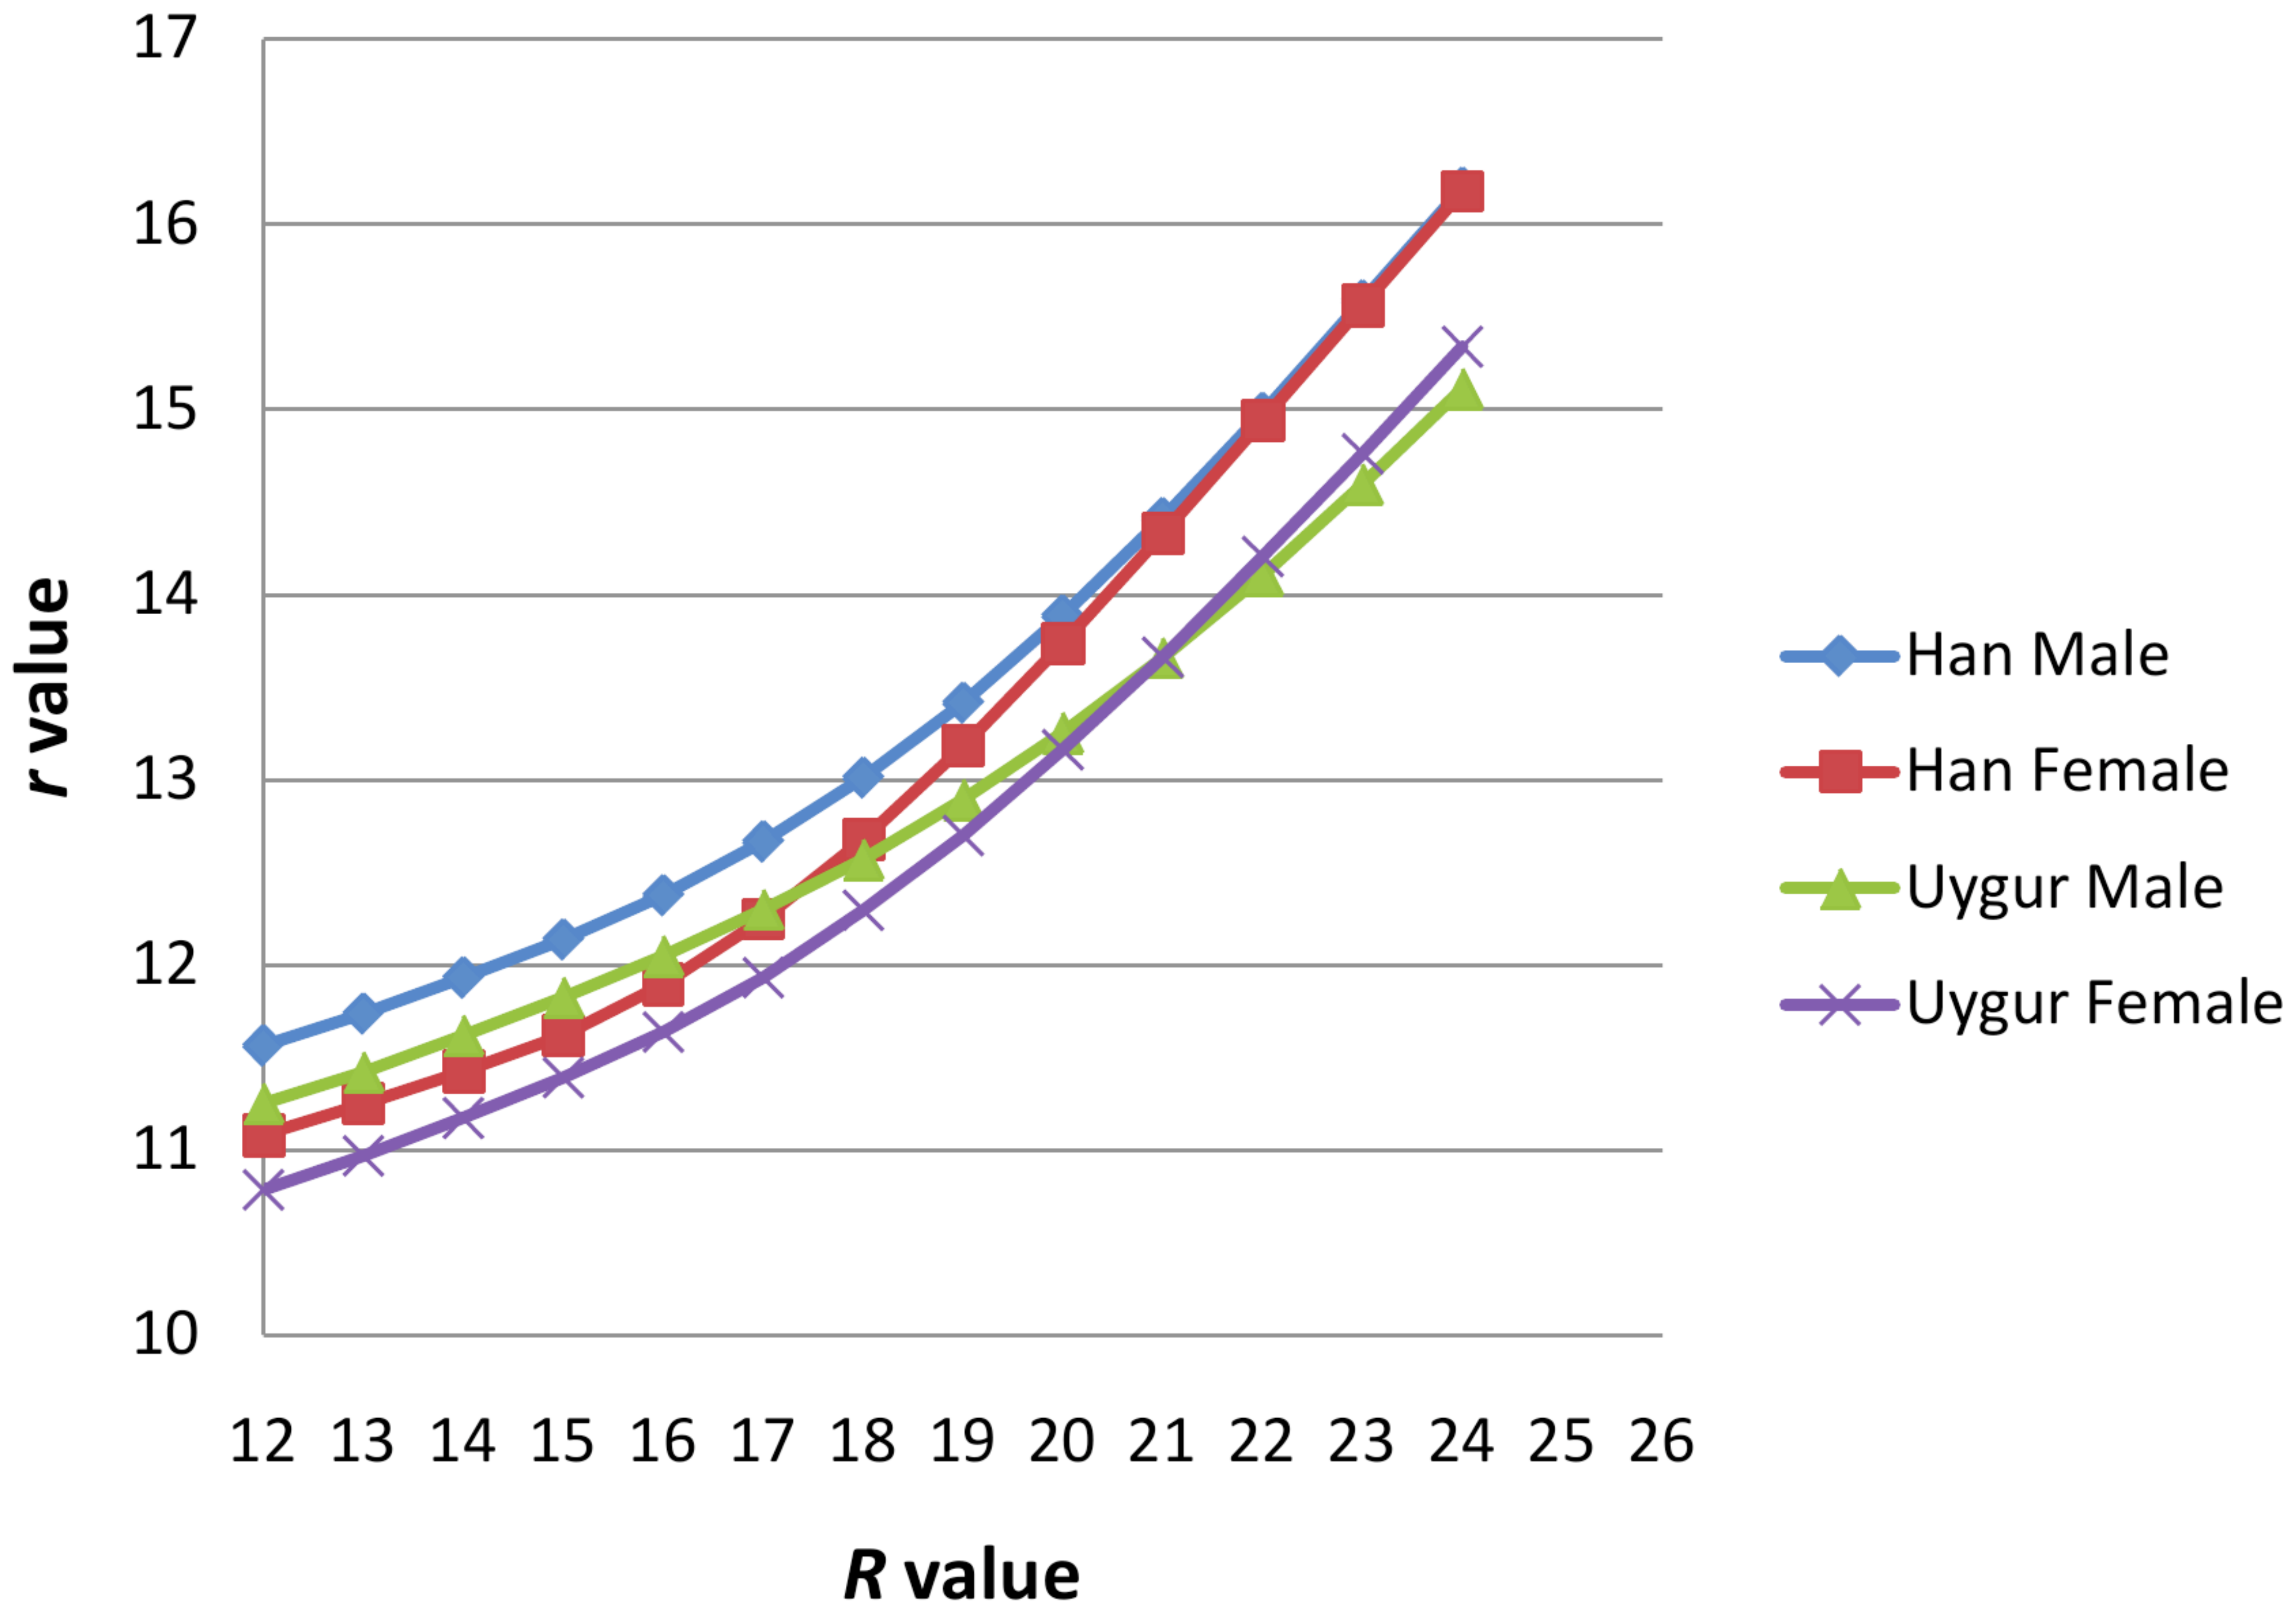

Supplement: 1471-2105-14-232-S2.pdf [file 1471-2105-14-232-S2.pdf]
